# Supplementary material
Source: PubMed Central journal article supplement (PMC3135786)
Supplement: NIHMS287038-supplement-Supp_Fig_S1-3___Table_S1.pdf [file NIHMS287038-supplement-Supp_Fig_S1-3___Table_S1.pdf]

## SUPPLEMENTARY FIGURE LEGENDS

**S. Fig. 1. ChIP-chip analysis reveals localization of VDR and RXR to the *Rankl* gene locus in response to 1,25(OH)<sub>2</sub>D<sub>3</sub>.** ST2 cells were treated with either vehicle or 1,25(OH)<sub>2</sub>D<sub>3</sub> for 6 hours and then subjected to ChIP-chip analysis using antibodies to VDR, RXR or IgG. Immunoprecipitated DNA was amplified by ligation-mediated PCR, labeled with Cy3 or Cy5, and co-hybridized to custom DNA microarrays as described in Experimental Procedures. *A*, The upper track depicts the *Rankl* gene locus. Nucleotide positions (Mb) are shown on chromosome 14 (February 2006 assembly). The *Rankl* gene is depicted by the horizontal blue bar and the positions of the distal enhancer regions are indicated below the chromosomal position and designated by descending blue bands. *B*, Interaction of VDR with the *Rankl* gene locus in response to 1,25(OH)<sub>2</sub>D<sub>3</sub>. Data tracks represent the log<sub>2</sub> ratios of fluorescence obtained from 1) a vehicle-treated sample precipitated with antibodies to either VDR or IgG (VDR<sub>veh</sub> vs IgG) (basal) and 2) an 1,25(OH)<sub>2</sub>D<sub>3</sub>-treated sample precipitated with antibodies to either VDR or IgG (VDR<sub>1,25</sub> vs IgG) (total inducible VDR). *C*, Interaction of RXR with the *Rankl* gene locus in response to 1,25(OH)<sub>2</sub>D<sub>3</sub> as described in (*B*). All peaks highlighted in red are statistically significant (FDR<0.05).

**S. Fig. 2. ChIP-chip analysis reveals recruitment of RNA pol II and components of the pre-initiation complex at mRLD2 and mRLD5 in response to 1,25(OH)<sub>2</sub>D<sub>3</sub>.** ST2 cells were treated as in Figure 1 and then subjected to ChIP analysis using antibodies to RNA pol II, TBP, TFIIB, TAF<sub>II</sub>250 or IgG. Immunoprecipitated DNA was amplified by ligation-mediated PCR, labeled with Cy3 or Cy5, and co-hybridized to custom DNA microarrays as described in Materials and Methods. *A*, Schematic of the *Rankl* locus as in Fig. 1A. *B*, Recruitment of RNA pol II to the *Rankl* gene locus in response to 1,25(OH)<sub>2</sub>D<sub>3</sub>. Data tracks represent the log<sub>2</sub> ratios of fluorescence obtained from 1) a vehicle-treated sample precipitated with antibodies to either RNA pol II or IgG (RNA pol II<sub>veh</sub> vs IgG) (basal) and 2) a 1,25(OH)<sub>2</sub>D<sub>3</sub>-treated sample precipitated with antibodies to either RNA pol II or IgG (RNA pol II<sub>1,25</sub> vs

IgG) (inducible). C, D, and E, Recruitment of TBP, TFIIB, TAF<sub>II</sub>250 under treatment conditions as described in (B). All peaks highlighted in red are statistically significant peaks (FDR<0.05).

**S. Fig. 3 VDR, C/EBP $\beta$  and CTCF DNA binding motifs.** A. Logos generated from Genomatix for VDR (A), C/EBP $\beta$ (B) and CTCF (C).

**S. TABLE 1. VDR, C/EBP $\beta$  and CTCF DNA binding motifs at the regulatory regions of the mouse *Rankl* gene locus.**

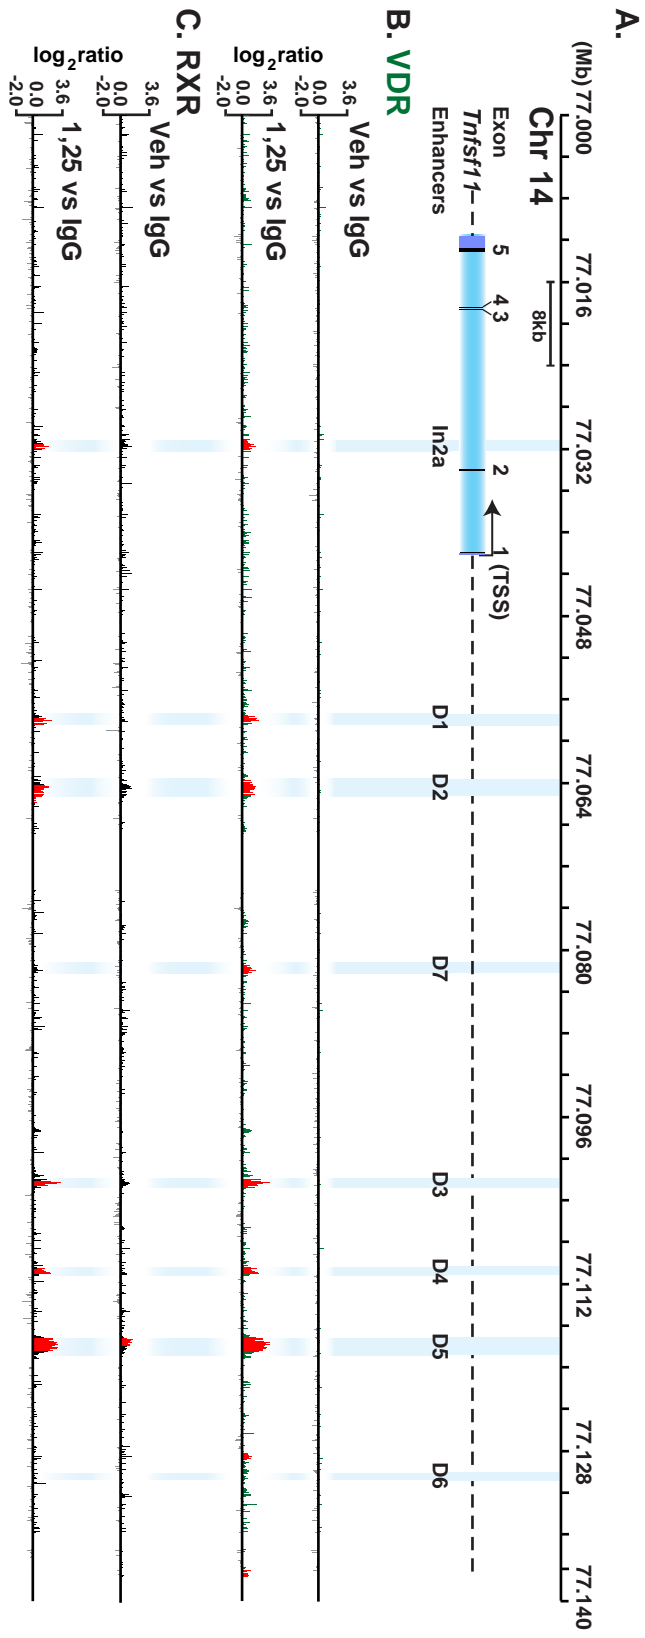

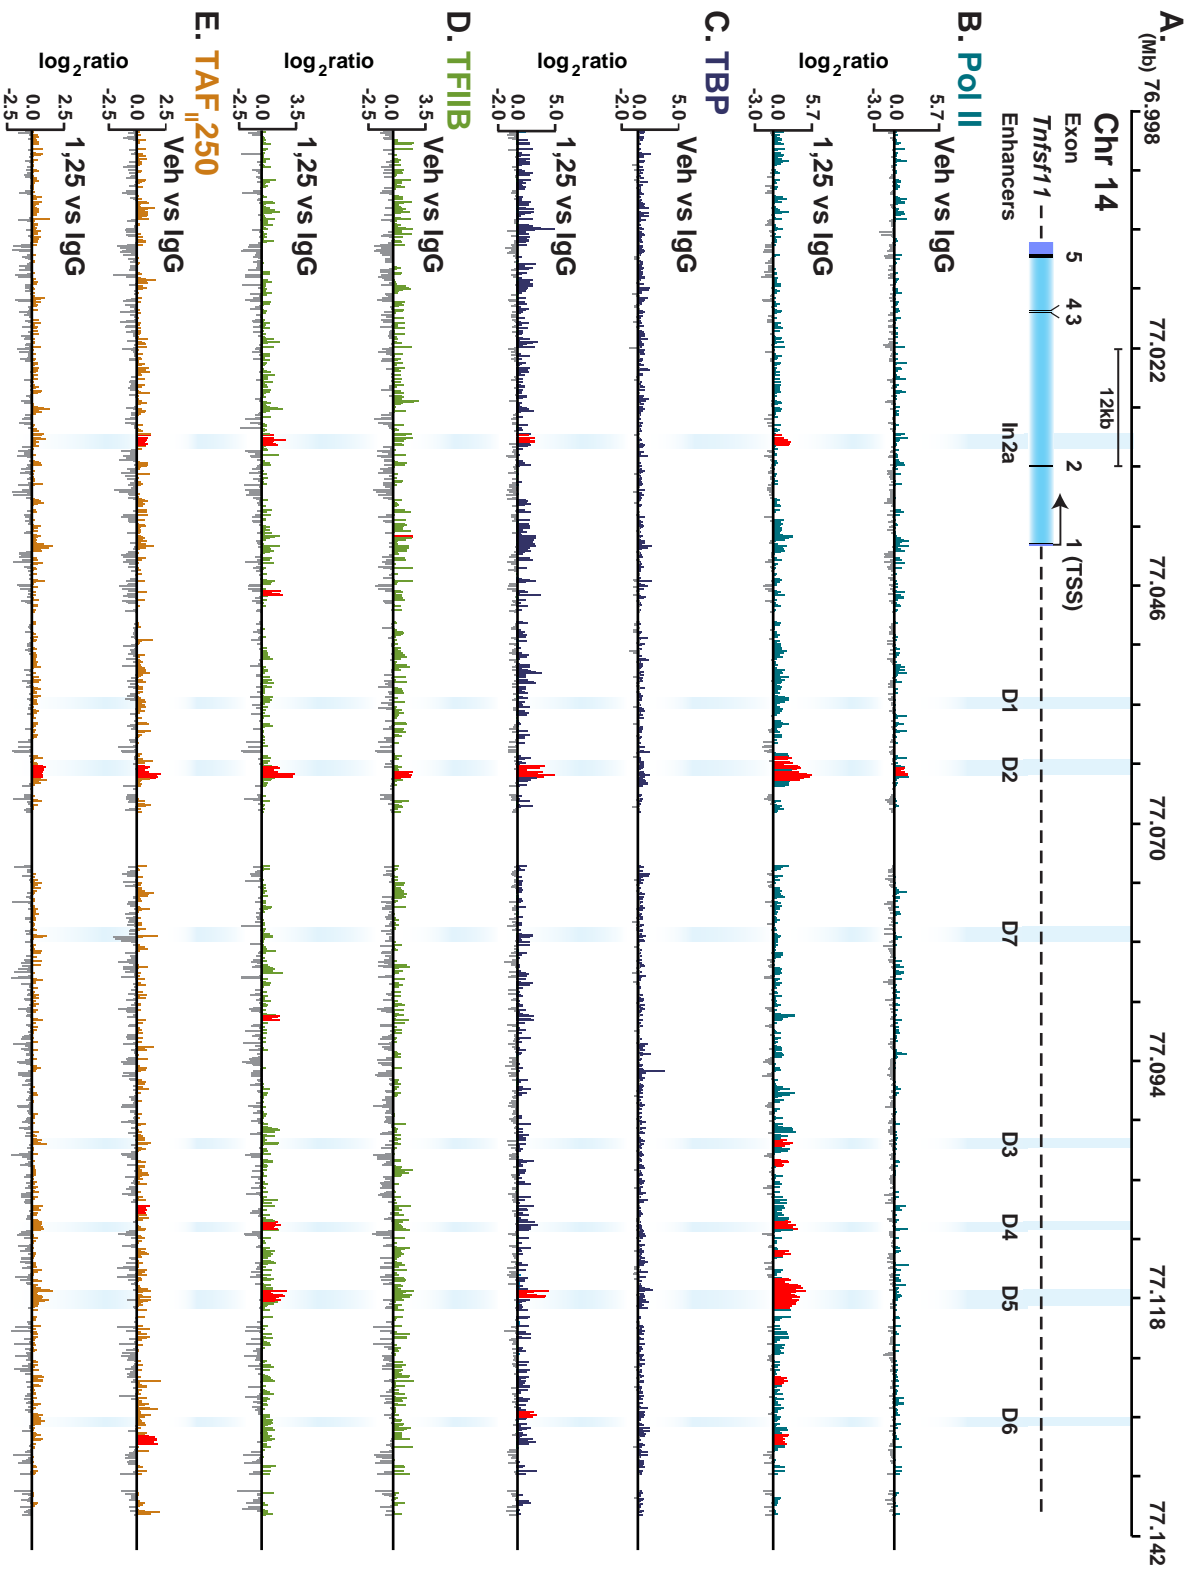

A.

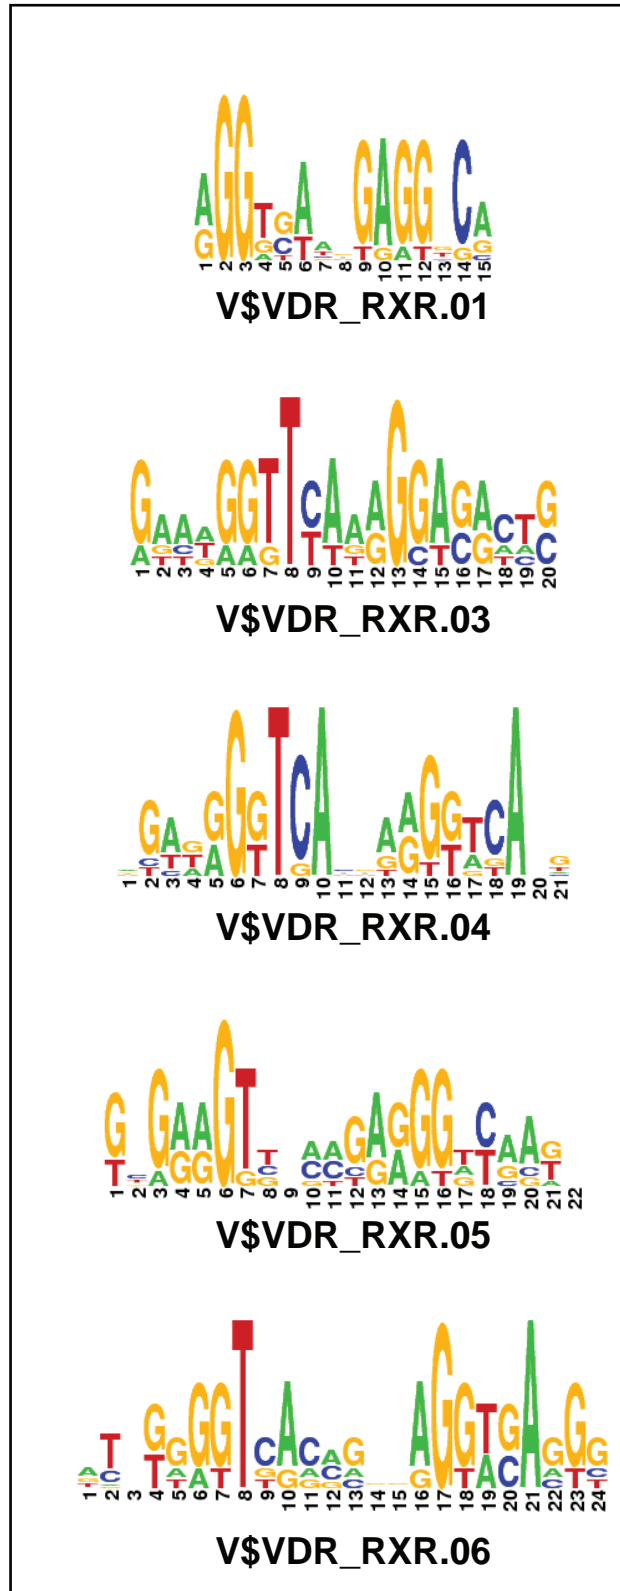

B.

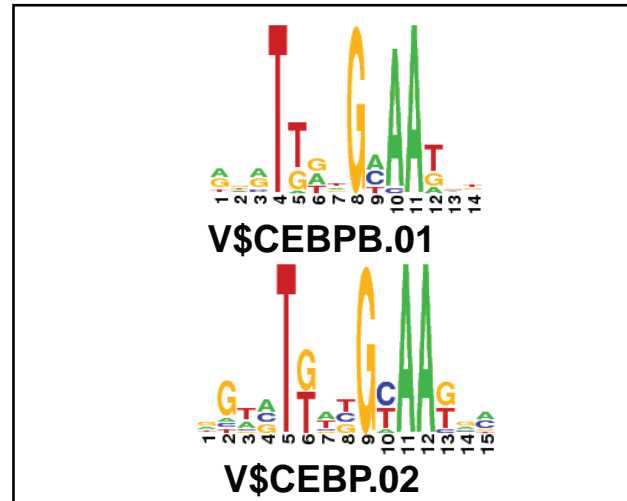

C.

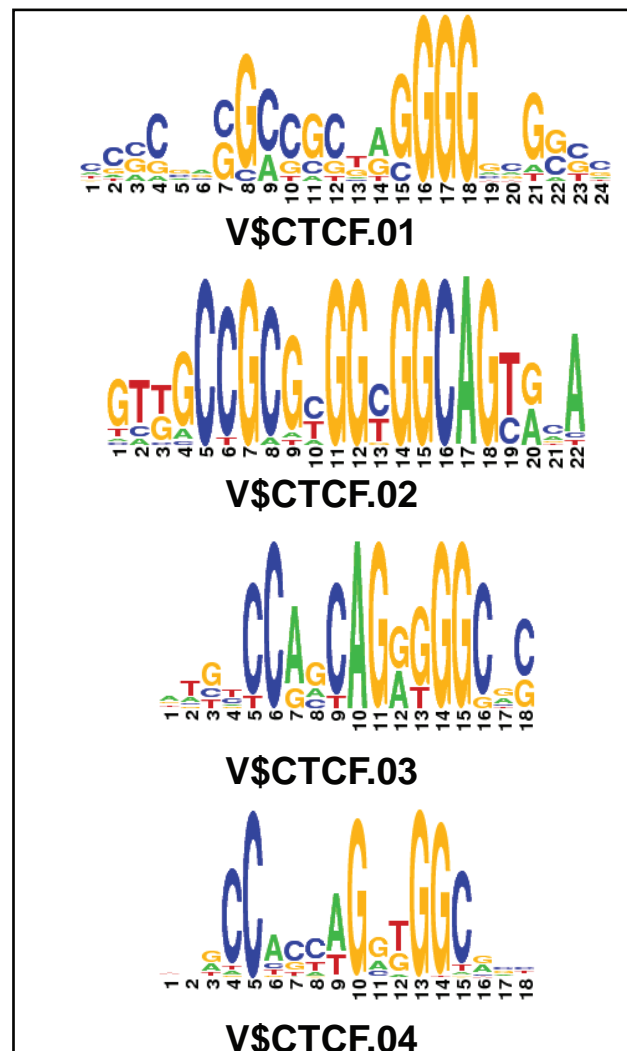

Supp.Table 1  
Martowicz *et. al.*

|                          | motif start | motif end | Matrix        | Opt  | strand | core sim | matrix sim | Sequence                   |
|--------------------------|-------------|-----------|---------------|------|--------|----------|------------|----------------------------|
| CTCF binding Sites       |             |           |               |      |        |          |            |                            |
| CTCF-1                   | 77007886    | 77007912  | V\$CTCF.04    | 0.85 | -      | 0.949    | 0.904      | ctaccagacaccaggGGGCgcatgt  |
| CTCF-1                   | 77007929    | 77007955  | V\$CTCF.04    | 0.85 | -      | 0.949    | 0.862      | ctaccagacaacagaGGGCgcatgt  |
| D5a                      | 77118035    | 77118061  | V\$CTCF.01    | 0.8  | +      | 1        | 0.847      | gaaccagcactaGGGAagcatgaa   |
| CTCF-2                   | 77217206    | 77217232  | V\$CTCF.02    | 0.69 | +      | 1        | 0.708      | cagggtgtctgtggaaGGCAGtgtgt |
| C/EBP beta binding sites |             |           |               |      |        |          |            |                            |
| D1                       | 77057096    | 77057110  | V\$CEBP.02    | 0.92 | -      | 0.885    | 0.929      | agagttagGAAAttc            |
| D1                       | 77057452    | 77057466  | V\$CEBPB.01   | 0.94 | +      | 1        | 0.953      | actgtttGAAAttc             |
| D1                       | 77057708    | 77057722  | V\$CEBP.02    | 0.92 | -      | 1        | 0.931      | agaatgtgCAAagt             |
| D1                       | 77057739    | 77057753  | V\$CEBPB.01   | 0.94 | +      | 1        | 0.94       | acagttagGAAAgag            |
| D2                       | 77063484    | 77063498  | V\$CEBP.02    | 0.92 | +      | 1        | 0.954      | ggaatttGCAAcca             |
| D2                       | 77063627    | 77063641  | V\$CEBP.02    | 0.92 | +      | 0.971    | 0.925      | tgacttagGTAActa            |
| D2                       | 77064675    | 77064689  | V\$CEBPB.01   | 0.94 | +      | 1        | 0.953      | aatcttaGCAAttc             |
| D7                       | 77082129    | 77082143  | V\$CEBP.02    | 0.92 | -      | 0.971    | 0.93       | ggtctattGTAAGca            |
| D7                       | 77082202    | 77082216  | V\$CEBP.02    | 0.92 | +      | 0.971    | 0.959      | tggatgatGTAAGca            |
| D3                       | 77100460    | 77100474  | V\$CEBPB.01   | 0.94 | +      | 1        | 0.942      | attgtatGCAAaag             |
| D3                       | 77100497    | 77100511  | V\$CEBP.02    | 0.92 | -      | 1        | 0.923      | ttcatgtGCAAtgc             |
| D3                       | 77101213    | 77101227  | V\$CEBP.02    | 0.92 | -      | 1        | 0.924      | ttcttagGCAAggt             |
| D3                       | 77101307    | 77101321  | V\$CEBPB.01   | 0.94 | +      | 1        | 0.947      | cagcttgGAAAgat             |
| D3                       | 77102156    | 77102170  | V\$CEBPB.01   | 0.94 | +      | 0.88     | 0.96       | agggttatGGAAtgc            |
| D3                       | 77102367    | 77102381  | V\$CEBPB.01   | 0.94 | -      | 1        | 0.945      | ttactttaGAAAtag            |
| D4                       | 77110762    | 77110776  | V\$CEBPB.01   | 0.94 | +      | 1        | 0.953      | tgctttgGAAAtgg             |
| D5                       | 77117172    | 77117186  | V\$CEBP.02    | 0.92 | +      | 0.885    | 0.954      | agtgtttGAAAgcc             |
| D5                       | 77117212    | 77117226  | V\$CEBP.02    | 0.92 | +      | 1        | 0.926      | ggagtgtGCAAAtt             |
| D5                       | 77117466    | 77117480  | V\$CEBPB.01   | 0.94 | -      | 1        | 0.967      | ctcattgtGCAAttg            |
| D5                       | 77118697    | 77118711  | V\$CEBPB.01   | 0.94 | +      | 1        | 0.949      | tgggttaaGAAAcaca           |
| D5                       | 77118826    | 77118840  | V\$CEBPB.01   | 0.94 | +      | 1        | 0.96       | aatctttGAAAtgc             |
| D6                       | 77135279    | 77129693  | V\$CEBPB.01   | 0.94 | -      | 1        | 0.981      | gaaattggGCAAtag            |
| D6                       | 77129687    | 77129701  | V\$CEBPB.01   | 0.94 | -      | 1        | 0.945      | gaagtgaGAAAttg             |
| D6                       | 77130517    | 77130531  | V\$CEBPB.01   | 0.94 | -      | 1        | 0.972      | agtgttaGCAAttg             |
| D6                       | 77130596    | 77130610  | V\$CEBPB.01   | 0.94 | -      | 0.94     | 0.941      | aaagttgaGTAAGta            |
| D6                       | 77130633    | 77130647  | V\$CEBPB.01   | 0.94 | -      | 1        | 0.981      | tggcttGAAAtat              |
| D6                       | 77130645    | 77130659  | V\$CEBPB.01   | 0.94 | +      | 1        | 0.951      | ccacttaGCAAtgg             |
| D6                       | 77130679    | 77130694  | V\$CEBPB.01   | 0.94 | -      | 1        | 0.951      | actttggGAAAtgg             |
| CTCF2                    | 77217002    | 77217016  | V\$CEBP.02    | 0.92 | +      | 0.971    | 0.93       | ggtgtattGTAAGcc            |
| CTCF2                    | 77217211    | 77217225  | V\$CEBP.02    | 0.92 | +      | 0.857    | 0.945      | tgtctgtGGAAggc             |
| VDR binding sites        |             |           |               |      |        |          |            |                            |
| D1                       | 77057876    | 77057900  | V\$VDR_RXR.04 | 0.79 | +      | 0.714    | 0.806      | acaactGTGTCaagaaggtcacttt  |
| D1                       | 77057902    | 77057926  | V\$VDR_RXR.04 | 0.79 | -      | 0.821    | 0.778      | gatgtggGCTCagctaggtcccaga  |
| D2                       | 77064338    | 77064362  | V\$VDR_RXR.05 | 0.79 | -      | 0.809    | 0.79       | ctgaGCAGttggcaggccatctc    |
| D7                       | 77081781    | 77081805  | V\$RXR_RXR.01 | 0.78 | -      | 0.833    | 0.806      | tggggaaaagagcagaGCTCaggcc  |
| D7                       | 77081908    | 77081932  | V\$VDR_RXR.04 | 0.79 | +      | 0.928    | 0.793      | tttgagaGTTCAcacaactgacaag  |
| D3                       | 77102300    | 77102324  | V\$VDR_RXR.01 | 0.85 | +      | 0.785    | 0.754      | gttcatgggctcttGGGgacaattc  |
| D4                       | 77110375    | 77111104  | V\$VDR_RXR.05 | 0.79 | -      | 1        | 0.802      | aaatGAAGtagatgggggggaggc   |
| D5                       | 77117973    | 77117997  | V\$VDR_RXR.04 | 0.79 | -      | 1        | 0.816      | taacaagGTCaagaggggctgac    |
| D6                       | 77130060    | 77130084  | V\$VDR_RXR.06 | 0.75 | -      | 1        | 0.779      | atgtaggaaccgggAGGTgaatgt   |
